# Supplementary material for: ENPP1 Immunobiology as a Therapeutic Target
Source: Oxford University Press journal article supplement (doi:10.1158/1078-0432.ccr-22-1681), 2023-01-31
Supplement: ccr-22-1681_supplementary_table_s1_clinical_trials_of_enpp1_inhibitors_supp_ts1.docx [file ccr-22-1681_supplementary_table_s1_clinical_trials_of_enpp1_inhibitors_supp_ts1.docx]

**Supplementary Table 1: Clinical Trials of ENPP1 inhibitors**

| **NCT** | **Project title** | **Conditions** | **Interventions** | **Sponsor** | **Phases** |
| --- | --- | --- | --- | --- | --- |
| [NCT05270213](https://ClinicalTrials.gov/show/NCT05270213) | RBS2418 Evaluation in Subjects With Unresectable or Metastatic Tumors | Advanced Cancer | RBS2418 | Riboscience, LLC.  Oncobay Clinical, Inc | Phase 1 |
